# Supplementary material
Source: Springer Nature journal article supplement (https://www.springermedizin.de/resource/supplementary/12957_2011_796_MOESM4_ESM.pdf/9565900)

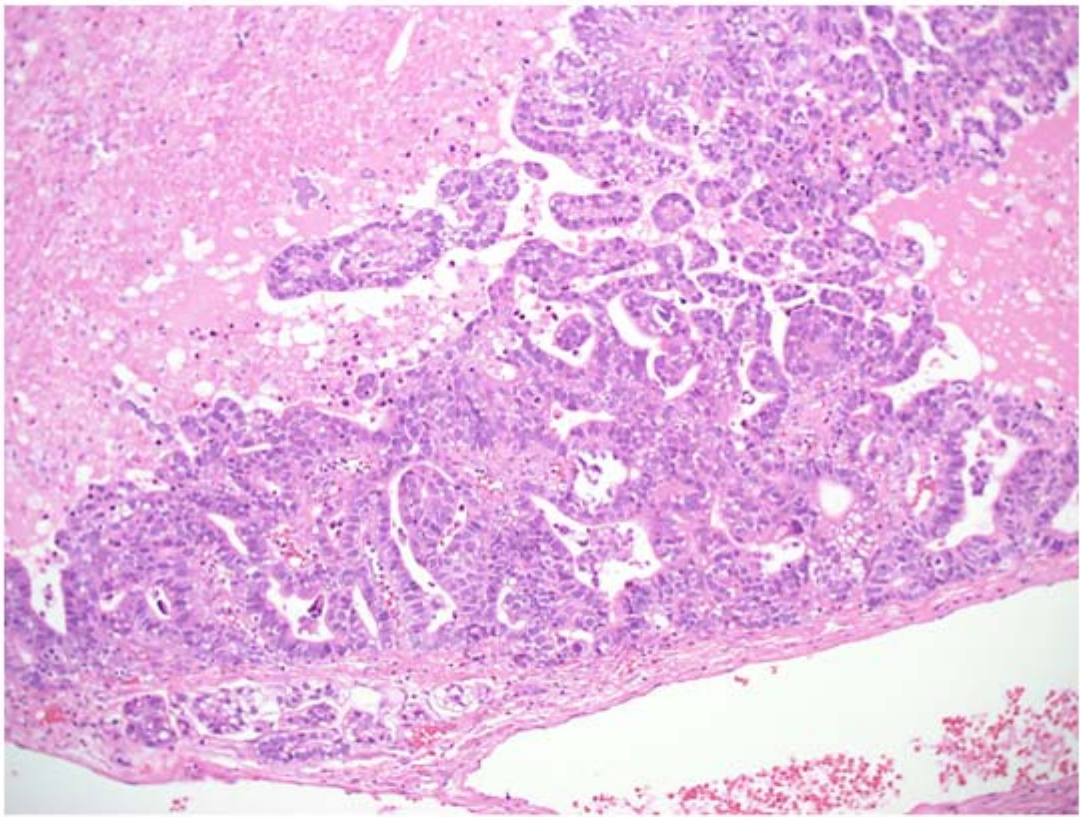

Supplement: MOESM4 [file 9565900]
